# Supplementary material
Source: publisher figshare collection journal article supplement (https://acs.figshare.com/ndownloader/files/3956938)
Supplement: Supplementary file 1 [file 3956938]

# Supporting Information

## Chemical Structure of Nitrogen-Doped Graphene with Single Platinum Atoms and Atomic Clusters as a Platform for the PEMFC Electrode

*Samantha Stambula<sup>1</sup>, Nicolas Gauquelin<sup>1</sup>, Matthieu Bugnet<sup>1</sup>, Sandeep Gorantla<sup>†,1</sup>, Stuart Turner<sup>‡,1</sup>, Shuhui Sun<sup>\*\*,2</sup>, Jian Liu<sup>2</sup>, Gaixia Zhang<sup>\*\*,2</sup>, Xueliang Sun<sup>2</sup>, and Gianluigi A. Botton<sup>\*,1</sup>*

<sup>1</sup>Department of Materials Science and Engineering, McMaster University, 1280 Main Street West, Hamilton, Ontario, L8S 4L8, Canada

<sup>2</sup>Department of Materials and Mechanical Engineering, University of Western Ontario, 1151 Richmond Street North, London, Ontario, N6A 5B9, Canada

Present Address

<sup>†</sup>Institute of Solid State Research, IFW Dresden, 01171 Dresden, Germany.

<sup>‡</sup>EMAT, University of Antwerp, Groenenborgerlaan 171, B-2020 Antwerpen, Belgium.

<sup>\*\*</sup>Energy Materials Telecommunications Research Centre, Institut National de la Recherche Scientifique, 1650 Lionel Boulet Boulevard, Varennes, Quebec, J3X 1S2, Canada

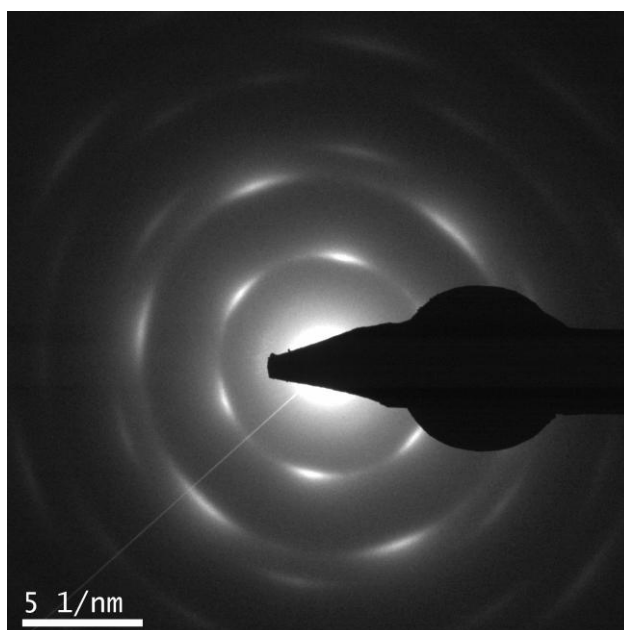

**Figure S1.** Diffraction pattern of N-doped graphene with 50 ALD Pt cycles. The diffraction pattern shows elongated spots from grain and stacking misorientations, lattice folding, and defects within the lattice in the field of analysis, where a single main grain was analyzed.

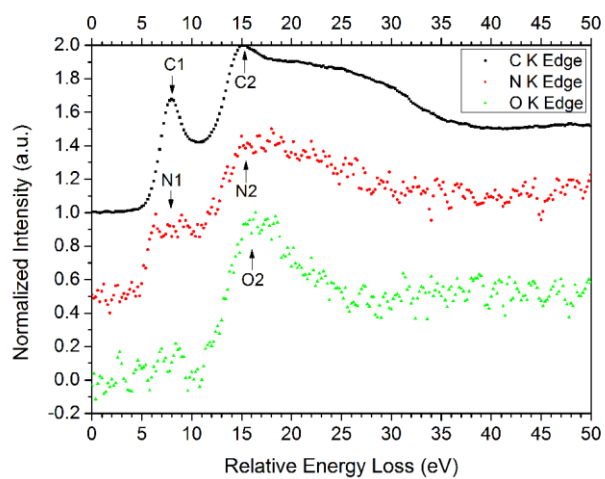

**Figure S2.** EELS of C-K, N-K, and O-K edges acquired from N-doped graphene with 50 ALD Pt cycles. The  $\pi^*$  and  $\sigma^*$  components of the C-K edge are labeled as C1 and C2, respectively. Furthermore, the N-K edge is also divided by the  $\pi^*$  (N1) and  $\sigma^*$  (N2) regions, where the O-K edge contains only a  $\sigma^*$  (O2) component.

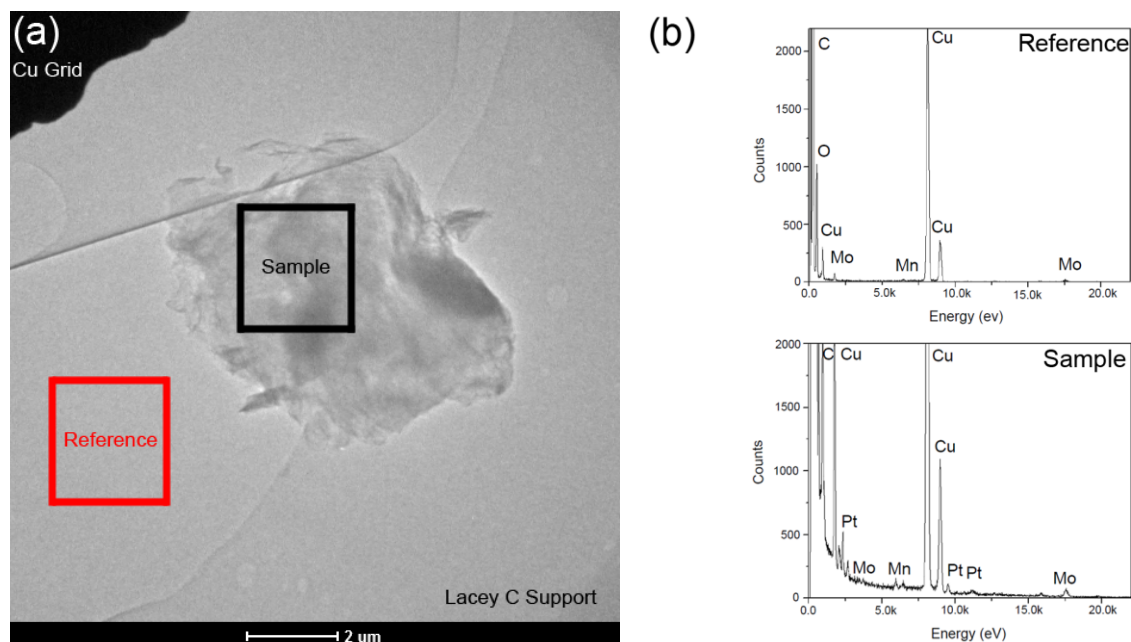

**Figure S3.** (a) TEM image of N-doped graphene with 100 ALD Pt cycles illustrating the acquisition areas of the EDXS. (b) EDX spectra acquired over vacuum (reference) and over the sample, resulting in multiple metallic peaks from the sample holder, apertures, and instrumental contributions.
